# Supplementary material for: Protein Stability and Unfolding Following Glycine Radical Formation
Source: Molecules. 2017 Apr 19;22(4):655. doi: 10.3390/molecules22040655 (PMC6154654; doi:10.3390/molecules22040655)
Supplement: Supplementary file 1 [file molecules-22-00655-s001.pdf]

# Supplementary Materials: Protein Stability and Unfolding Following Glycine Radical Formation

Michael C. Owen \*, Imre G. Csizmadia, Béla Viskolcz and Birgit Strodel

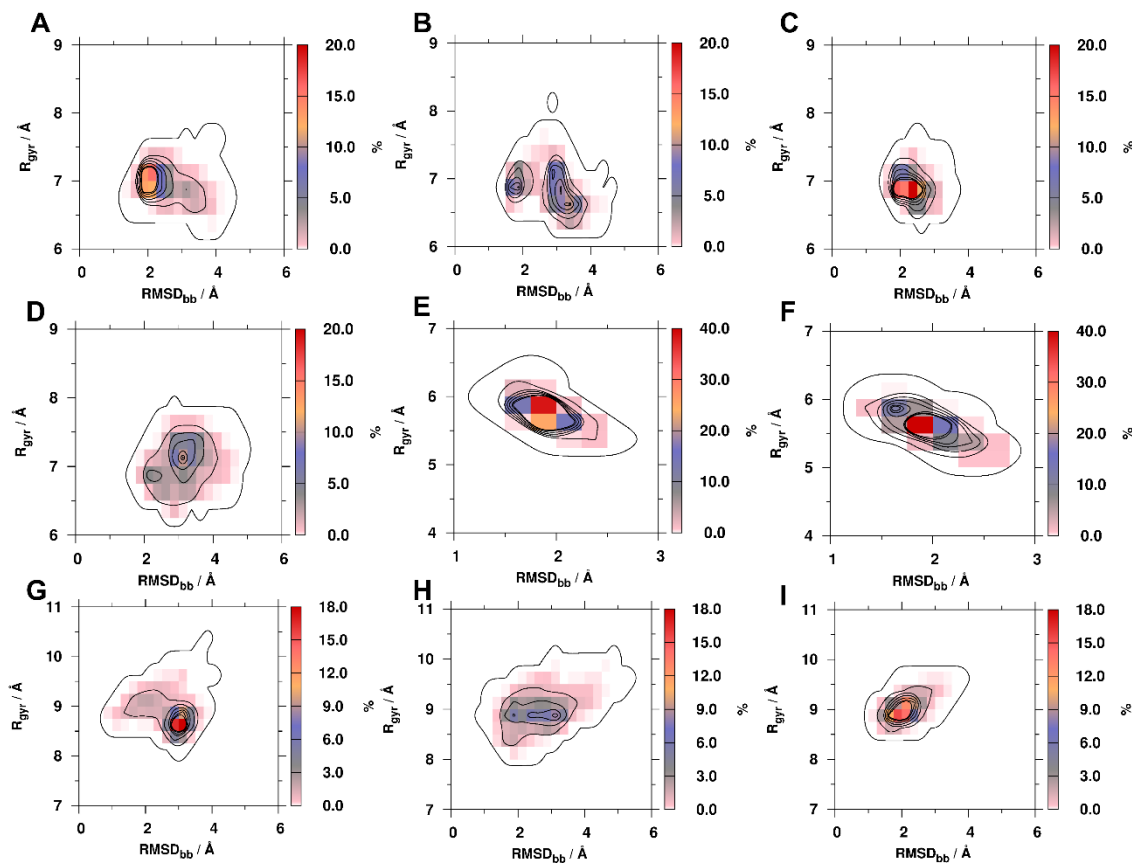

**Figure S1.** The  $R_{gyr}$ - $RMSD$  density plots of the Trp cage (A), Trp cage  $C_{\alpha}$ -centered Gly radical in place of Gly10 (GLR10) (B), Trp cage (GLR11) (C), Trp cage (GLR15) (D), Trp zipper (E), Trp zipper (GLR6) (F), the villin headpiece (G), villin (GLR11) (H) and villin (GLR33) (I).

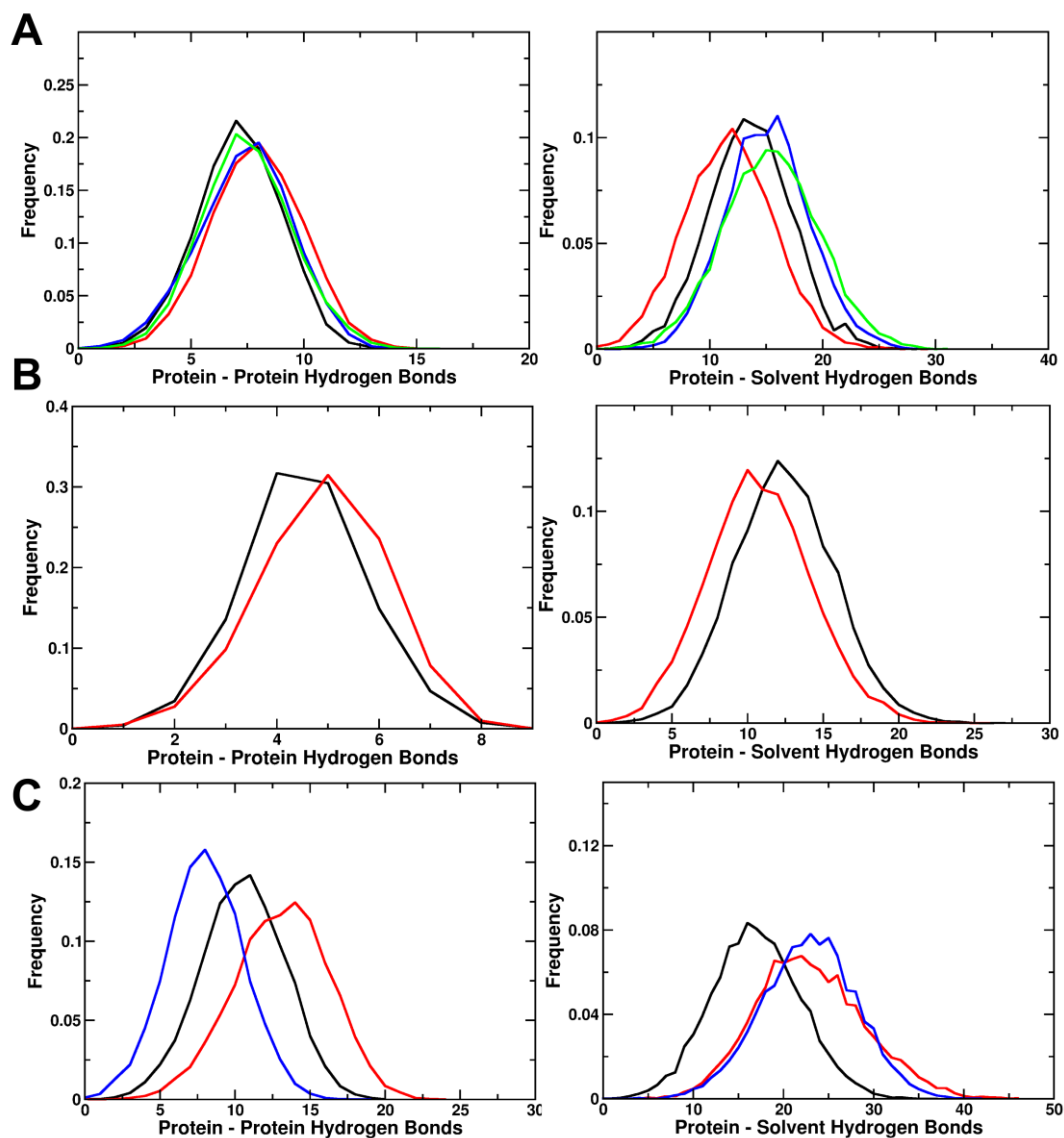

**Figure S2.** The number of protein-protein hydrogen bonds (left panel) and protein-solvent hydrogen bonds (right panel). Row **A** contains the data for the Trp cage (in black), Trp cage(GLR10) (in red), Trp cage(GLR11) (in red), Trp cage(GLR15) (in blue). Row **B** contains data for the Trp zipper (in black), Trp zipper(GLR6) (in red). Row **C** contains data for the villin headpiece (in black), villin(GLR11) (in red) and villin(GLR33) (in blue).
